# Supplementary material for: Assessment of PaO2/FiO2for stratification of patients with moderate and severe acute respiratory distress syndrome
Source: HighWire-hosted journal article supplement (doi:10.1136/bmjopen-2014-006812), 2015-03-01
Supplement: bmjopen-2014-006812supp.pdf [file bmjopen-2014-006812supp.pdf]

## APPENDIX

### **Additional list of investigators in the Spanish Initiative for Epidemiology, Stratification and Therapies**

**for ARDS (SIESTA) Network:** José López, Demetrio Carriedo, Ana María Domínguez (Hospital General de León, León); Javier Belda, Gerardo Aguilar, Francisco Martí, Armando Maruenda (Hospital Clínico de Valencia, Valencia); José M. Añón, María J. Bruscas (Hospital Virgen de la Luz, Cuenca); Iñaki Saralegui (Hospital Santiago Apóstol, Vitoria); Santiago Lubillo, Lina Pérez-Méndez (Hospital Universitario N.S. de Candelaria, Tenerife); Dario Toral (Hospital Universitario 12 de Octubre, Madrid); Miguel A. Romera (Hospital Universitario Puerta de Hierro, Madrid); Antonio Santos-Bouza (Hospitales Universitarios de Santiago, Santiago de Compostela); Eli Zavala, Ramón Adalia (Hospital Clinic, Barcelona); Frutos del Nogal (Hospital Severo Ochoa, Madrid); Luís Ramos (Hospital General de La Palma, La Palma); Gumersindo González-Díaz, Antonia López-Martínez (Hospital Morales Meseguer, Murcia); Santiago Macías, Noelia Lázaro (Hospital General de Segovia, Segovia); Francisco Gandía, David Andaluz, Laura Parra (Hospital Clínico Universitario de Valladolid, Valladolid); Javier Collado, José I. Alonso (Hospital Río Carrión, Palencia); Antonio Álvarez (Hospital Virgen de la Concha, Zamora); Noelia Albalá, Ángel Rodríguez-Encinas (Hospital Clínico de Salamanca, Salamanca); Raúl Sánchez, Fabiola Tena (Hospital General de Soria, Soria); Alberto Indarte, María E. Perea (Hospital General Yagüe, Burgos); Fernando Mosteiro (Complejo Hospitalario Universitario de La Coruña, La Coruña); Eleuterio Merayo (Complejo Hospitalario de Orense, Orense); Alfonso Ambrós (Hospital General de Ciudad Real, Ciudad Real); José Manuel Gutiérrez (Complejo Hospitalario Universitario de Albacete, Albacete); Francisca Prieto (Hospital Santa Bárbara, Puertollano, Ciudad Real); Ricardo Fernández, José Ignacio Lozano (Hospital de Hellín, Albacete); Antonio García, Carmen Martín (Hospital La Mancha Centro, Alcázar de San Juan, Ciudad Real); Lluís Blanch, Gemma Gomá, Gisela Gili (Corporació Sanitaria Parc Taulí, Sabadell, Barcelona); Jesús Villar, Rosa Lidia Fernández (Hospital Universitario Dr. Negrin, Las Palmas de Gran Canaria); Robert M. Kacmarek (Massachusetts General Hospital, Boston, MA, USA).
